# Supplementary material for: Growth methods' effect on the physical characteristics of CsPbBr3 single crystal
Source: Royal Society of Chemistry journal article supplement (doi:10.1039/d3cp04645a), 2023-12-05
Supplement: d3cp04645a1.pdf [file d3cp04645a1.pdf]

## Supporting Information

### Growth Methods' Effect on the Physical Characteristics of CsPbBr<sub>3</sub> Single Crystal

Mohamed Ben Bechir,<sup>\*</sup><sup>a</sup> and Faisal Alresheedi<sup>b</sup>

<sup>a</sup> *Laboratory of Spectroscopic and Optical Characterization of Materials (LaSCOM),  
Faculty of Sciences, University of Sfax, BP1171 – 3000 Sfax, Tunisia.*

<sup>a</sup> *Department of Physics, College of Science, Qassim University, Buraidah 51452, Saudi Arabia.*

<sup>\*</sup> *Corresponding author. E-mail address: [mohamedbenbechir@hotmail.com](mailto:mohamedbenbechir@hotmail.com)*

### Supplementary Figures

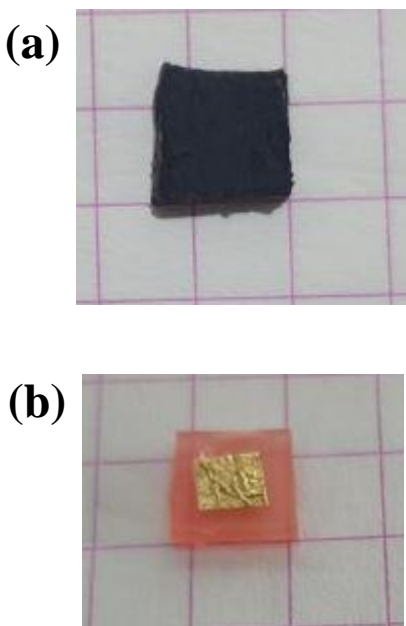

**Figure. S1.** Electrode Configurations for Characterizing CsPbBr<sub>3</sub> SCs: (a) Conventional SCLC and Photodetector Assessments with Carbon Electrodes, and (b) TM-SCLC Measurements with Gold Electrodes.

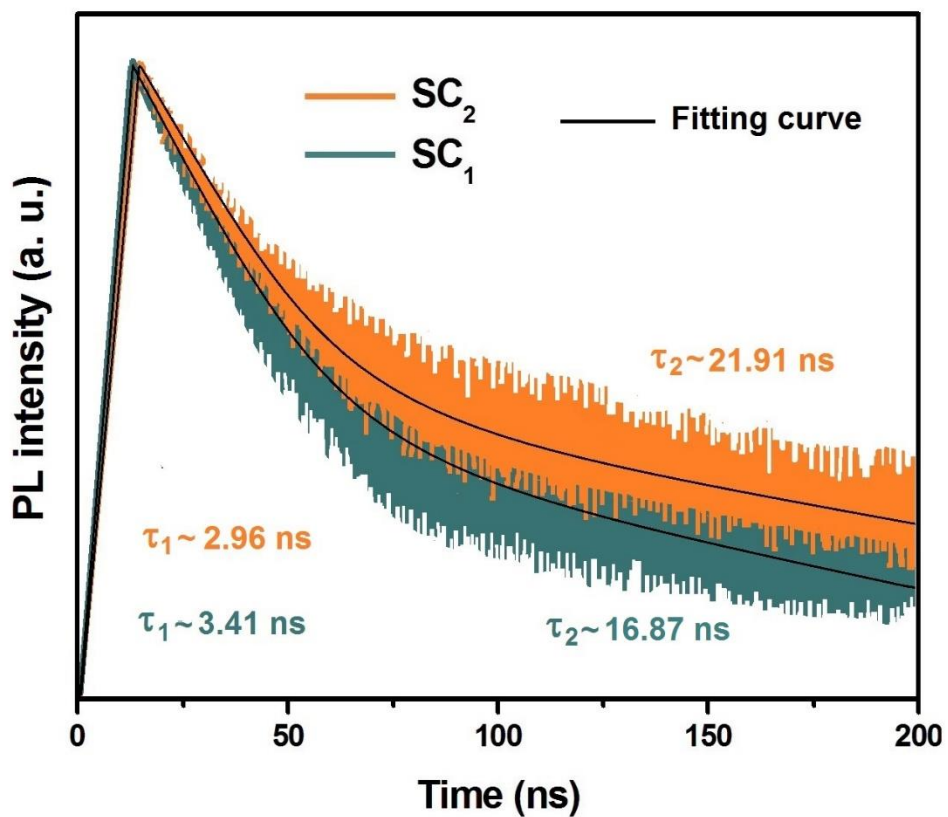

**Figure. S2.** Time-Resolved Photoluminescence Spectroscopy of both Crystals at room temperature.

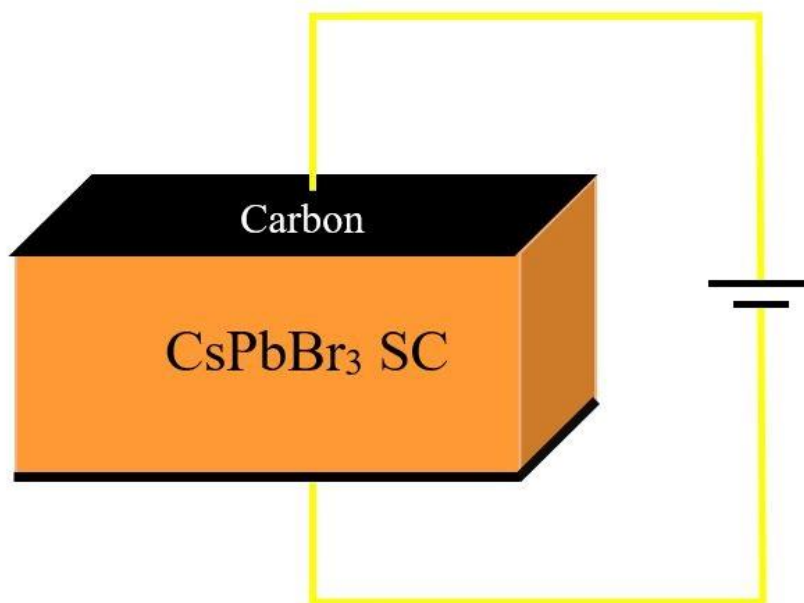

**Figure. S3.** Schematic Representation of Device Configuration.

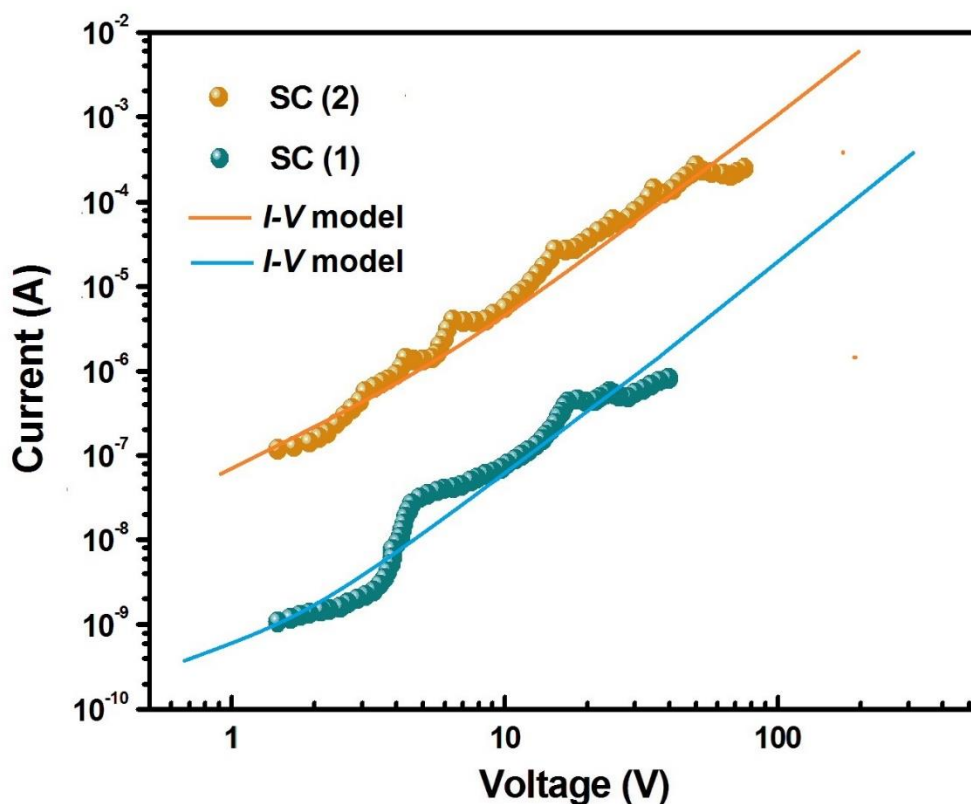

**Figure. S4.** Spectral Analysis of TM-SCLC Behavior for both types of CsPbBr<sub>3</sub> SCs at T = 310.15 K. Utilizing Solid Lines to Depict an I-V Model Involving Monoenergetic Transport Band and Trap for Analyzing Charge Carrier Concentrations in the Investigated Perovskite.

## Supplementary Tables

**Table S1.** FWHM and  $L_s$  Values According to all XRD Reflections.

| Miller indices (hkl) | FWHM (°)        |                 | $L_s$ (%)       |                 |
|----------------------|-----------------|-----------------|-----------------|-----------------|
|                      | SC <sub>1</sub> | SC <sub>2</sub> | SC <sub>1</sub> | SC <sub>2</sub> |
| (020)                | 0.051           | 0.063           | 0.063           | 0.120           |
| (101)                | 0.039           | 0.048           | 0.044           | 0.095           |
| (040)                | 0.085           | 0.096           | 0.112           | 0.179           |
| (202)                | 0.091           | 0.103           | 0.127           | 0.184           |
| (060)                | 0.032           | 0.042           | 0.028           | 0.041           |
| (303)                | 0.021           | 0.033           | 0.023           | 0.037           |

**Table S2.** Exploring Optoelectronic Characteristics via TM-SCLC in both types of CsPbBr<sub>3</sub> SCs.

|                                                           | SC <sub>1</sub>    | SC <sub>2</sub>       |
|-----------------------------------------------------------|--------------------|-----------------------|
| $\mu_0$ (m <sup>2</sup> V <sup>-1</sup> s <sup>-1</sup> ) | 0.017              | 0.396                 |
| $n_f$ (cm <sup>-3</sup> )                                 | $2.62 \times 10^8$ | $2.54 \times 10^8$    |
| $n_t$ (cm <sup>-3</sup> )                                 | $8.81 \times 10^9$ | $2.08 \times 10^{10}$ |
| $E_F - E_v$ (eV)                                          | 0.57               | 0.57                  |
| $E_t - E_v$ (eV)                                          | 0.695              | 0.717                 |
| $E_t - E_F$ (eV)                                          | 0.125              | 0.147                 |

## Supplementary Equations

$$L_s = \frac{B_s}{4 \tan \theta} \quad (\text{S1})$$

$B_s$  characterizes structural expansion, signifying the variance in the integral profile width when comparing a standard (referred to as 'std') with the target sample slated for analysis ('obs').

$$B_{struct} = \sqrt{B_{obs}^2 - B_{std}^2} \quad (\text{S2})$$

$B_{obs}$  represents the width derived from the compound undergoing analysis, whereas  $B_{std}$  signifies the width derived from the standard compound, which remains unaffected by any structural broadening phenomena.

$$R = \frac{I_{ph} - I_D}{P_{irra} S} \quad (\text{S3})$$

where  $I_d$  and  $I_{ph}$  indicated the dark current and the photocurrent, respectively.  $S$  and  $P_{irra}$  indicating the crystal surface area and the incident light intensity power, respectively.

$$D^* = \frac{R}{(2eI_D)^{1/2}} \quad (\text{S4})$$

$$D = D_0 e^{\left(-\frac{\Delta H}{RT}\right)} \quad (\text{S5})$$

Where  $D$  represents the rate of diffusion,  $\Delta H$  denotes the activation energy for diffusion,  $D_0$  stands for the constant of diffusion,  $T$  corresponds to the temperature of the solution, and  $R$  signifies the universal gas constant.

$$n_{trap} = \frac{2\varepsilon\varepsilon_0V_{TFL}}{eL^2} \quad (S6)$$

Incorporating essential parameters, the equation includes  $\varepsilon_0$  ( $8.85 \times 10^{-12}$  F/m), which denotes vacuum permittivity,  $\varepsilon$  is the dielectric constant of  $\text{CsPbBr}_3$  ( $\varepsilon = 22$ ),  $e$  symbolizing the elementary charge of an electron ( $1.6 \times 10^{-19}$  C), and  $L$  standing for the thickness of the SC (2 mm).

$$\mu_d = \mu_0 \Theta = \frac{jL^3}{\varepsilon_0\varepsilon_r(1-\gamma)(2-\gamma)^2V^2} \quad (S7)$$

where  $\mu_0$  stands for microscopic mobility. The variable 'm' ( $m = \frac{1}{\gamma} = \frac{d \ln j}{d \ln V}$ ) corresponds to the gradient of the I-V plot (refer to [Figure S4\(b\)](#)), while the variable  $\Theta$  is characterized as  $\Theta = \frac{n_f}{n_f+n_t}$ ,

with  $n_t$  and  $n_f$  indicating the concentration of trapped charge carriers and free charge carriers, respectively.

$$n_f = \frac{Lj}{e\mu_0(2-\gamma)V} \quad (S8)$$

$$n_t = \frac{\varepsilon_0\varepsilon_r(1-\gamma)(2-\gamma)V}{eL^2} \quad (S9)$$

$$E_F - E_v = \frac{k_B T}{e} \ln \left( \frac{n_f}{N_v} \right) \quad (S10)$$

$$E_F - E_t = \frac{k_B T}{e} \ln \left( \frac{n_t}{N_t} \right) \quad (S11)$$

where  $k_B$  is Boltzmann's constant,  $h$  is Planck's constant,  $E_v$  is the energy of the valence band,  $N_t$  and  $N_v$  indicating the density of electronic states and the density of states in the valence band, respectively.
